# Supplementary material for: A CRISPR activation and interference toolkit for industrial Saccharomyces cerevisiae strain KE6-12
Source: PubMed Central journal article supplement (PMC7471924; doi:10.1038/s41598-020-71648-w), 2020-09-03
Supplement: 41598_2020_71648_MOESM1_ESM.pdf [file 41598_2020_71648_MOESM1_ESM.pdf]

## Supplementary material

### A CRISPR activation and interference toolkit for industrial *Saccharomyces cerevisiae* strain KE6-12

Elena Cámara, Ibai Lenitz, Yvonne Nygård

Figure S1: Verification of *mRuby2* integration and expression in KE6-12

Figure S2: Growth curves of KE6-12-Ruby strains expressing CRISPRa/i plasmids

Figure S3: Verification of *Venus* integration and expression in KE6-12-Ruby

Figure S4. Growth curves of KE6-12 strains expressing dCas9 or dCas9-VPR and sgRNAs targeting different promoters

Figure S5. Growth curves of KE6-12 strains expressing CRISPRi plasmids

Figure S6. Verification of *SSK2* disruption in KE6-12

Figure S7. PCR verification of sgRNA integration into the CRISPRa/i plasmids

Figure S8. PCR verification of KE6-12 clones after growth in hydrolysate

Table S1. Growth of KE6-12-Ruby carrying different CRISPRa/i plasmids

Table S2. mRuby2 fluorescence of KE6-12-Ruby strains

Table S3. Venus fluorescence of KE6-12-Ruby-Venus strains

Table S4: Primers used for amplification of PCR products for cloning

Table S5: MoClo plasmid construction

Table S6: Primers used for donor DNA amplification or creation

Table S7: Scores obtained by CRISP-ERA and YEAST-CRISPRi for the sgRNAs selected

Table S8. Oligonucleotides used as placeholder or sgRNA

Table S9: Primers used for verification of sgRNA integration and strain construction

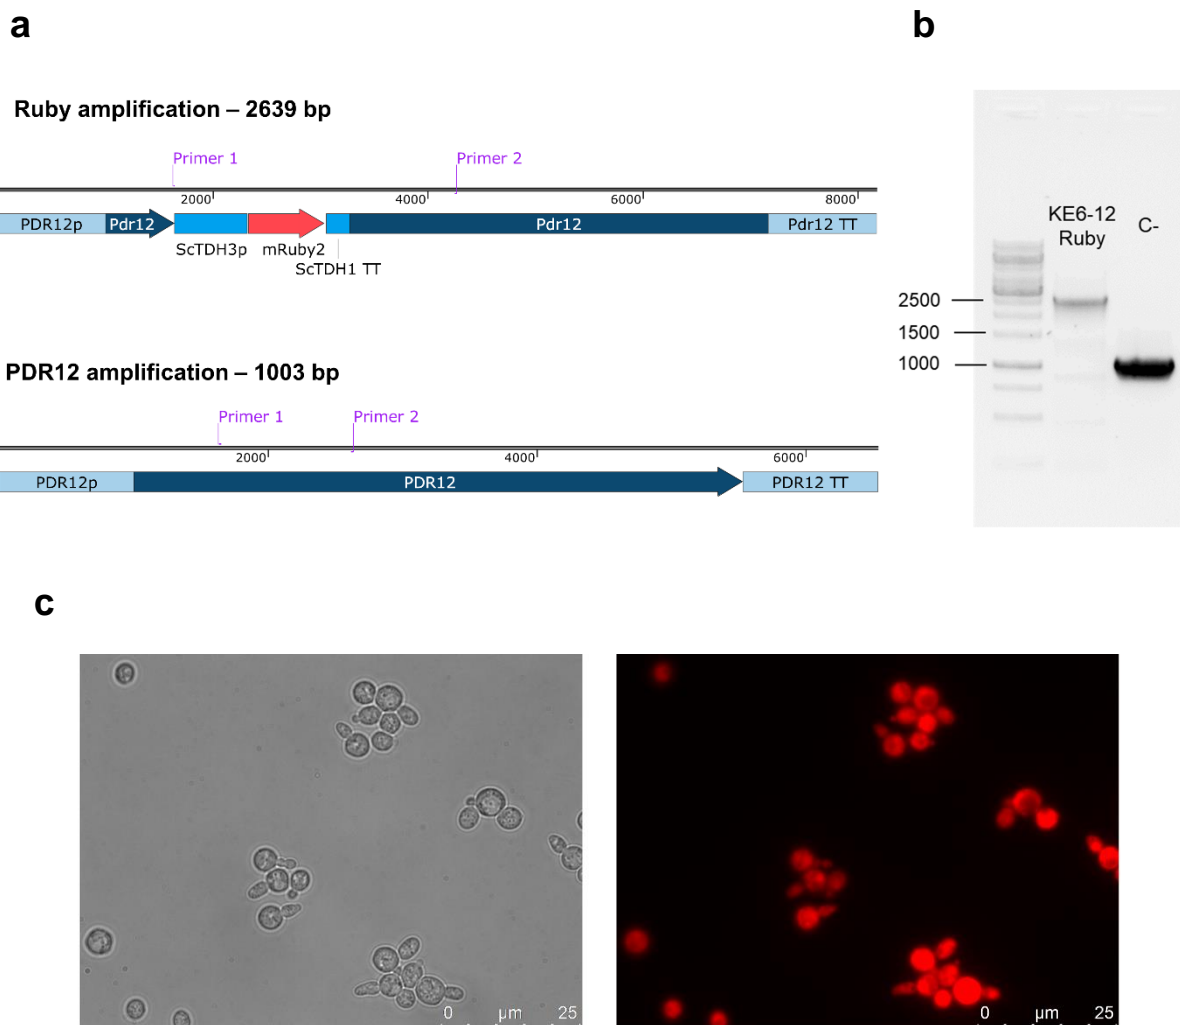

Figure S1. Verification of *mRuby2* integration and expression in KE6-12. Primers used specified in Table S7. a) PCR amplification with primer 1 and 2 results in a fragment of 2639 bp when *PDR12* is correctly disrupted by the integration of the *mRuby* cassette. Amplification of the intact *PDR12* gene would result in a fragment of 1003 bp. b) Verification of *mRuby2* integration in the KE6-12. As a negative control (C-) *PDR12* was amplified from a KE6-12 strain. The GeneRuler 1 kb DNA Ladder ready-to-use (Thermo Scientific) was used for size quantification. c) *mRuby2* fluorescence expression of the verified strain, named KE6-12-Ruby. Visualization was done with a Leica DMI4000B microscope, using the RFP filter, exposure time of 30ms and gain of 1.5. Magnification Camera 70x and Visual 1000x.

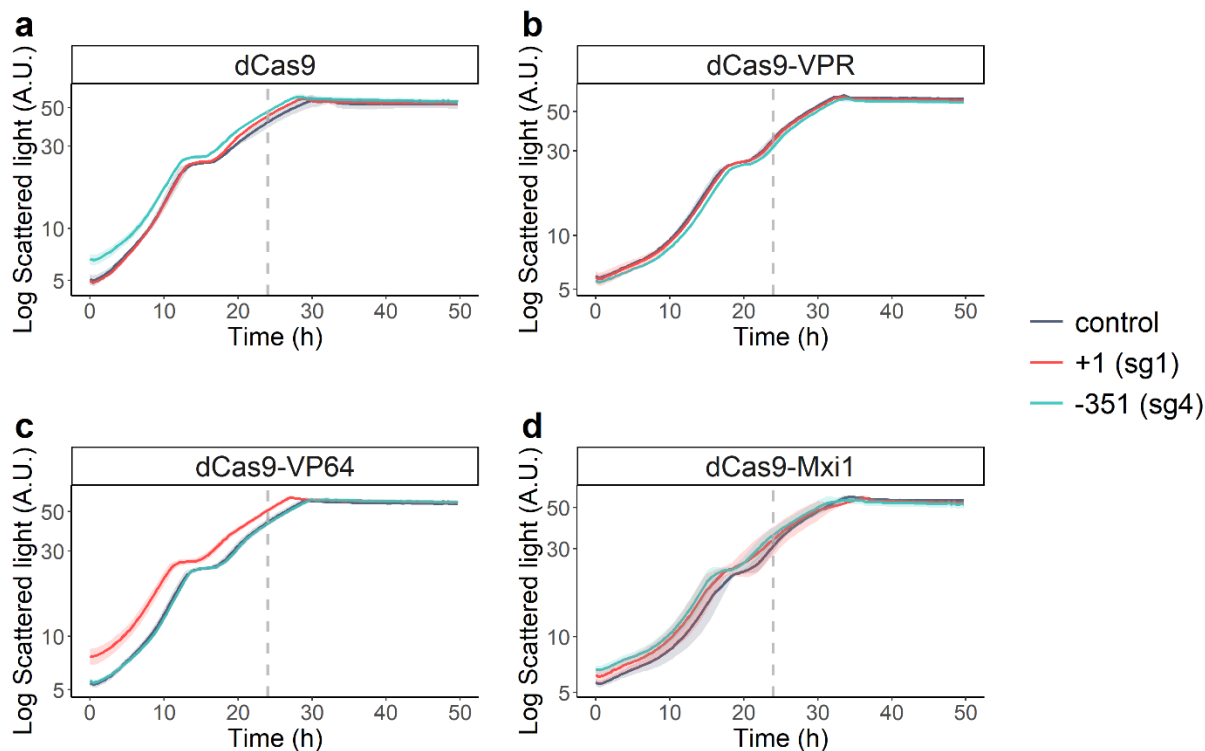

Figure S2. Growth curves of KE6-12-Ruby strains expressing CRISPRa/i plasmids, measured as biomass light scattering. dCas9 was targeting a region at +1 (sg1; red line) or -351 (sg4; turquoise line) bp from the transcription starting site, the control strain carried the CRISPRa/i plasmid with the placeholder (control; grey line). Samples for flow cytometry were taken after 24 hours of cultivation (dashed line). Data obtained from three biological replicates monitored with a Biolector; shadowed regions show the standard deviation (SD).

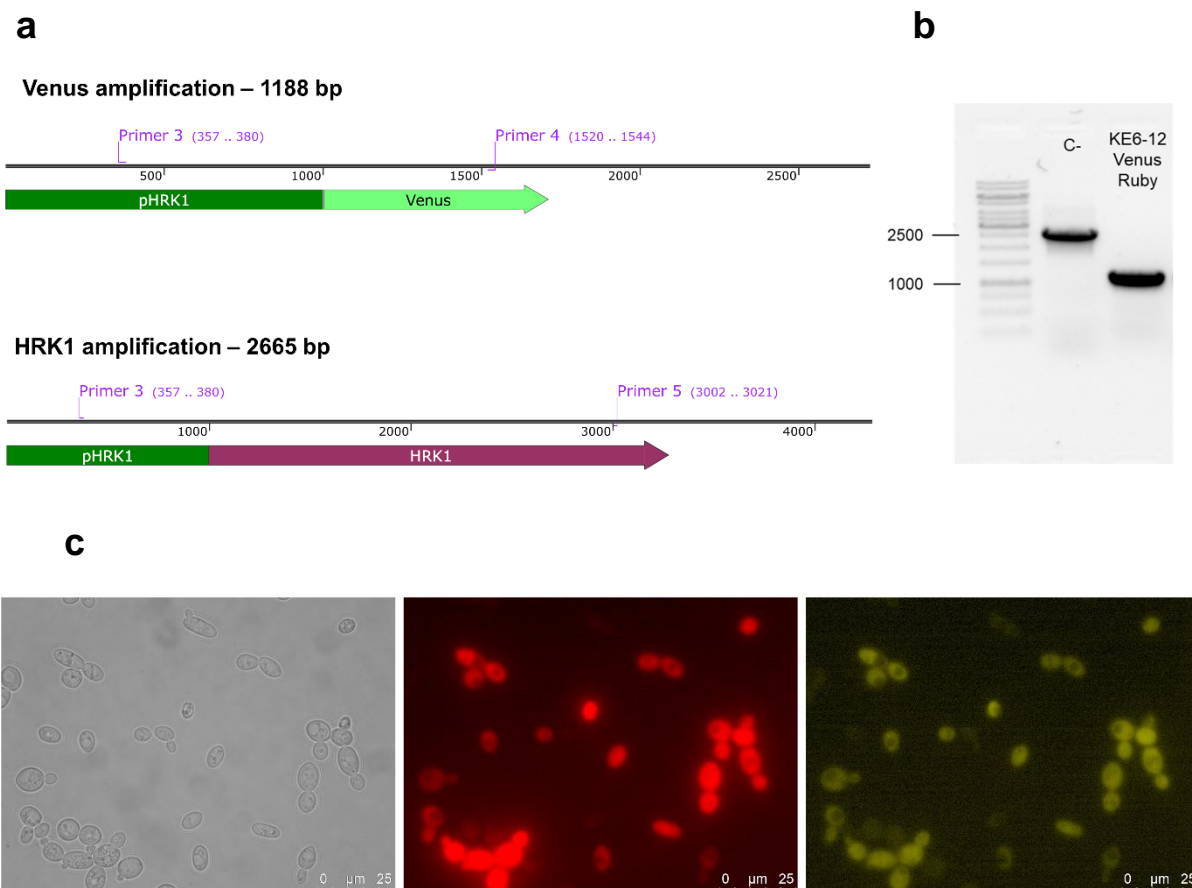

Figure S3. Verification of *Venus* integration and expression in KE6-12-Ruby. Primers used specified in Table S7. a) The expected size of the amplification product was 1188 bp when *Venus* was correctly integrated in the *HRK1* locus, or 2665 bp when *HRK1* was intact. b) Verification of *Venus* integration in the KE6-12-Ruby strain. As a negative control (C-) *HRK1* was amplified from a KE6-12-Ruby strain. The GeneRuler 1 kb DNA Ladder ready-to-use (Thermo Scientific) was used for size quantification. c) mRuby2 (center) and Venus (right) fluorescence of the verified strain, named KE6-12-Ruby-Venus. The visualization was done using a Leica DMI4000B microscope, using the RFP and the GFP filter for mRuby2 and Venus fluorescence, respectively. The exposure time was 30ms and gain of 1.5. Magnification Camera 70x and Visual 1000x.

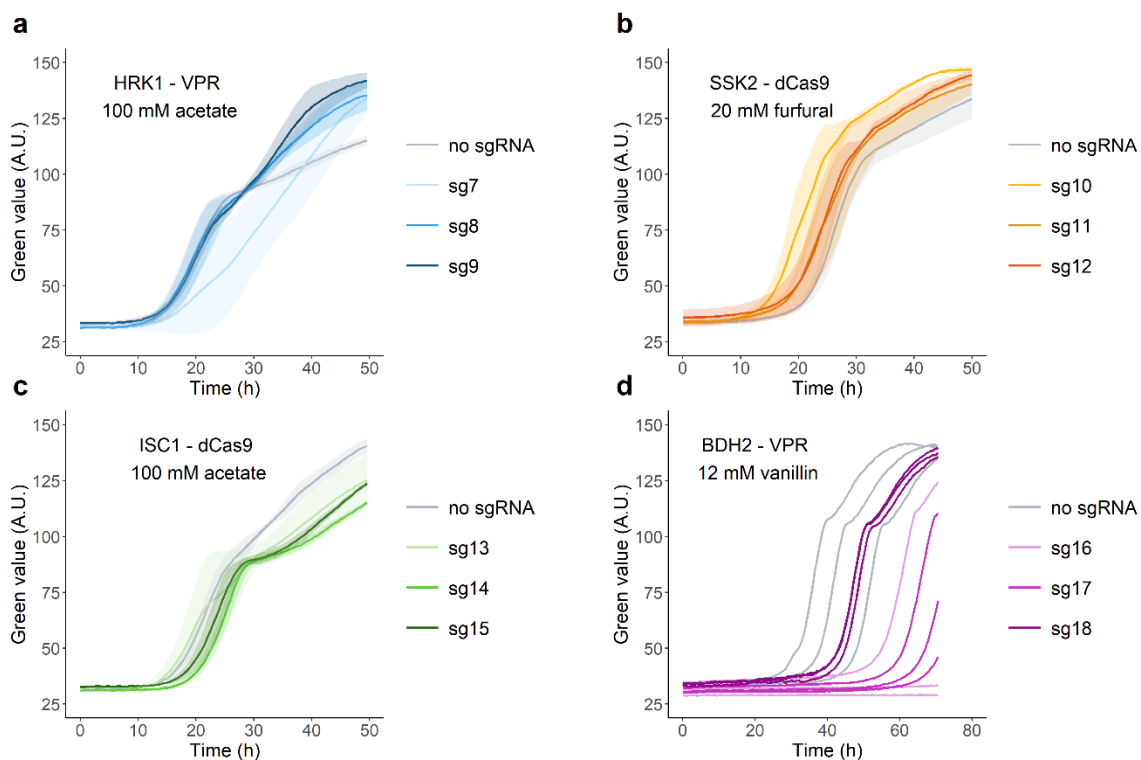

Figure S4. Growth curves of KE6-12 strains in minimal medium buffered with different inhibitors expressing a CRISPRa/i plasmid and an sgRNA targeting promoters of a) *HRK1*, b) *SSK2*, c) *ISC1* and d) *BDH2* or the placeholder (no sgRNA strain). Data obtained from three biological replicates monitored with a Growth Profiler; shadowed regions show the standard deviation (SD).

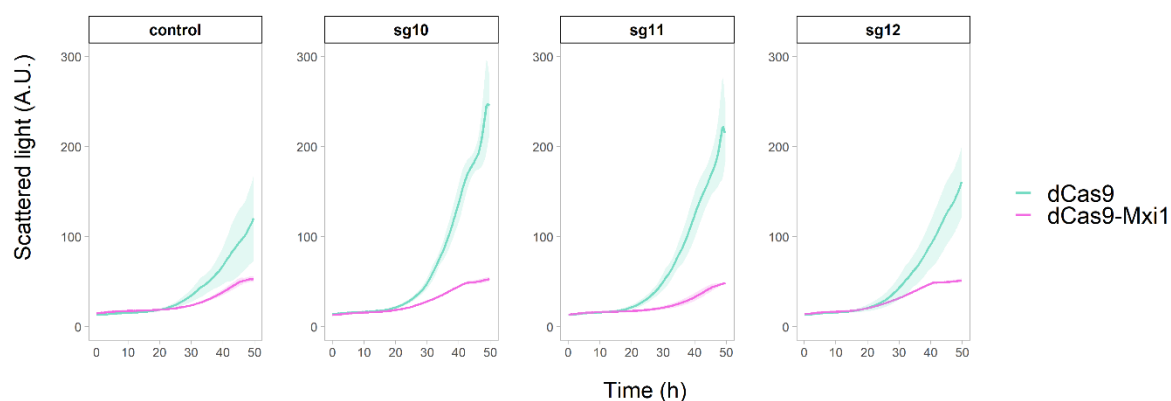

Figure S5. Growth curves of KE6-12 strains expressing CRISPRi plasmids, measured as biomass light scattering. The strains express *dCas9* (turquoise line) or *dCas9-Mxi1* (purple line) and an sgRNA targeting *SSK2p*. Data obtained from three biological replicates monitored with a Biolector; shadowed regions show the standard deviation (SD).

**a****SSK2 disrupted – 2661 bp**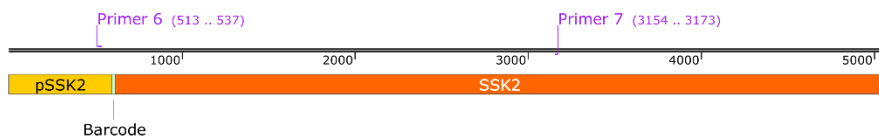**SSK2 intact – 3344 bp**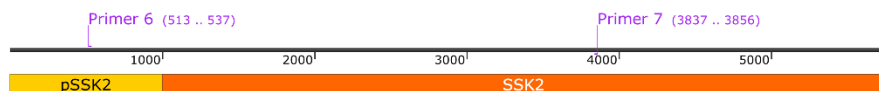**b**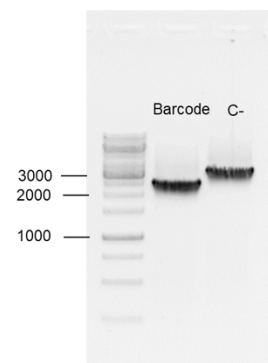

Figure S6. Verification of *SSK2* disruption. a) Disruption of *SSK2* was done by insertion of a barcode with a stop codon and a removal of 683 bp. The expected size of the amplification product was 2661 bp when *SSK2* was correctly disrupted, or 3344 bp when *SSK2* was intact. b) Verification of *SSK2* disruption in the KE6-12 strain. As a negative control (C-) *SSK2* was amplified from KE6-12. The GeneRuler 1 kb DNA Ladder ready-to-use (Thermo Scientific) was used for size quantification. Primers used specified in Table S7.

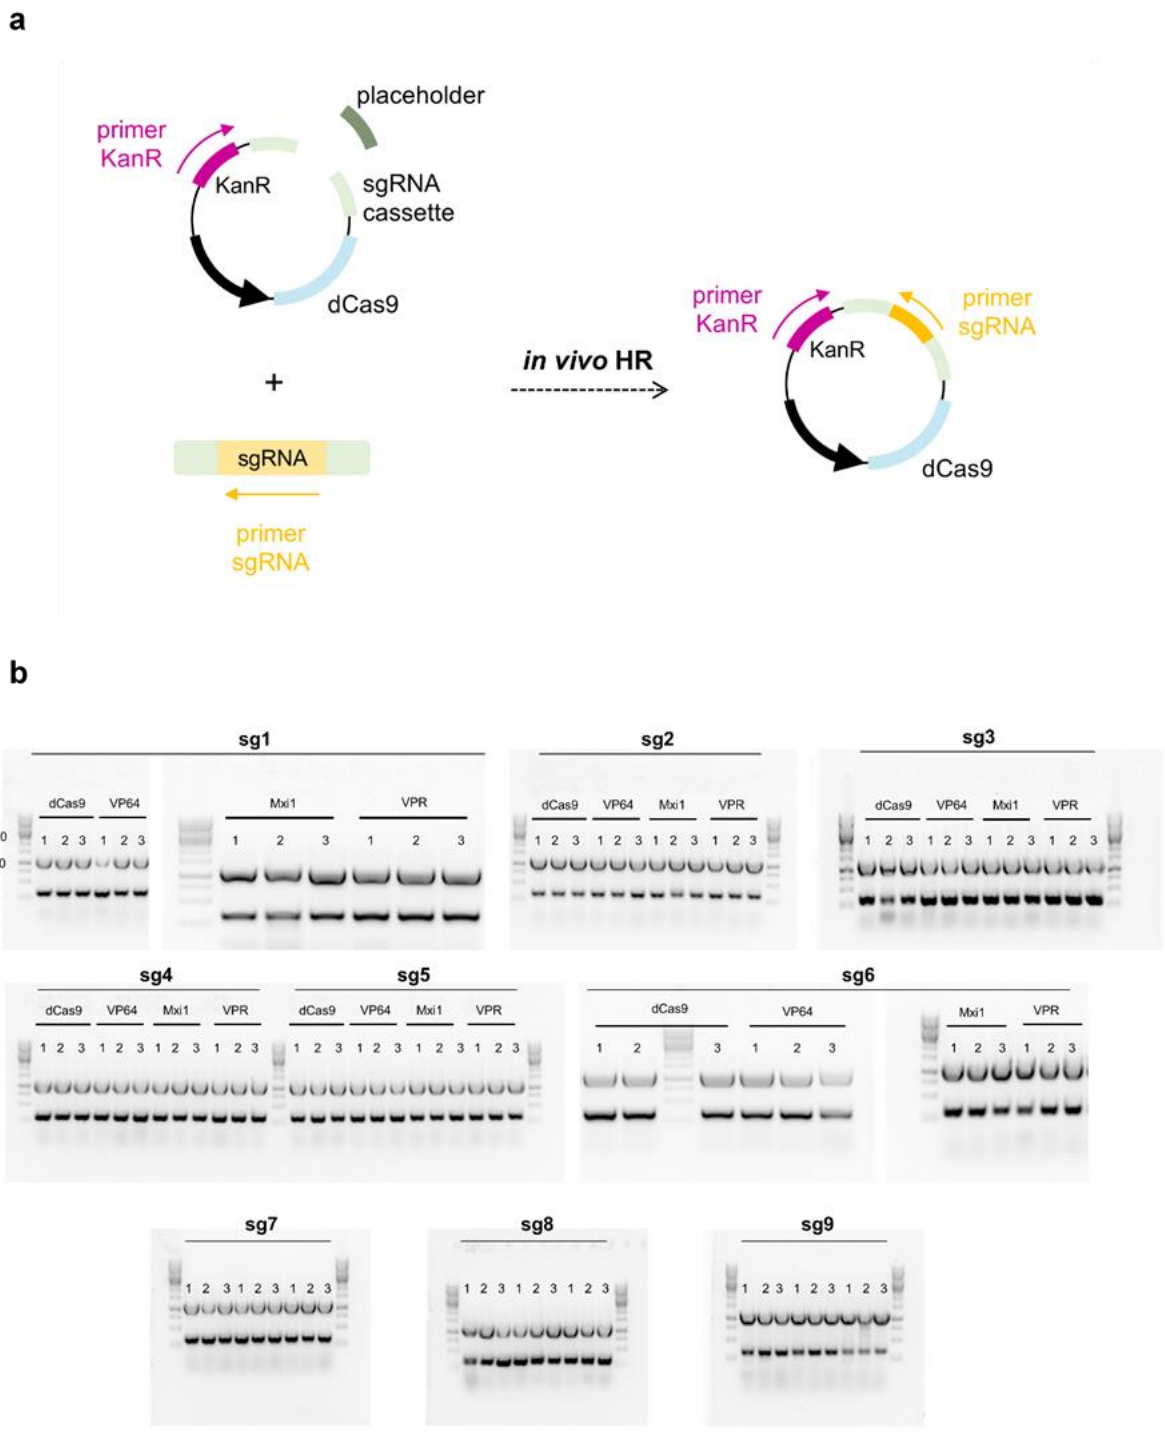

Figure S7. Colony PCR verification of sgRNA integration into the CRISPRa/i plasmids. a) The target-specific sgRNA from a double stranded oligonucleotide was inserted into the CRISPRa/i plasmid through yeast *in vivo* homologous recombination. Primers amplifying a fragment from the resistance marker to the specific sgRNA sequence of each construct were used to verify the assembly. b) The expected size of the product (from the sgRNA to p*TEF* of KanR) was 350 bp (lower band). As an amplification control for the colony PCR, a set of primers for *ADE2* amplification were added (1250 bp product, upper band). GeneRuler 1 kb DNA Ladder ready-to-use (Thermo Scientific) used for size quantification.

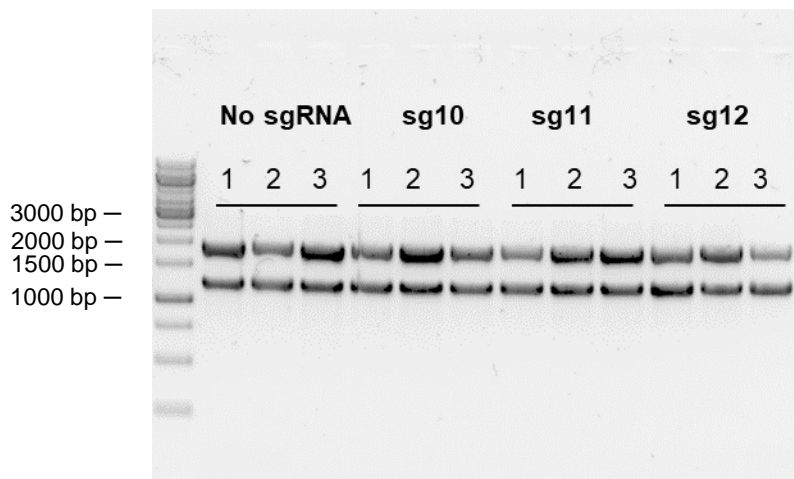

Figure S8. PCR verification of KE6-12 clones after growth in hydrolysate. A fragment of *dCas9* was amplified in all the clones to verify the presence of the CRISPRi plasmid; the expected size was 1955 bp (upper band). As an amplification control for the colony PCR, a set of primers for *ADE2* amplification were added (1250 bp product, lower band). GeneRuler 1 kb DNA Ladder ready-to-use (Thermo Scientific) used for size quantification.

Table S1. Growth of KE6-12-Ruby expressing different CRISPRa/i plasmids. The growth parameters were calculated using PRECOG (Fernandez-Ricaud et al. 2016, BMC Bioinformatics 2016;17:1–15). The No\_CRISPRa/i strain was generated by transforming KE6-12-Ruby with an empty plasmid lacking *dCas9* or *sgRNA* expression cassettes. Strains were grown in microbioreactors in YPD medium for 35 h. Data represents three biological replicates  $\pm$  SD. Statistical analysis was performed using the Student's t-test. A P-value lower than 0.05 was considered statistically significant. Statistical relevance obtained by the statistical tests performed is shown with “ns” for  $p > 0.05$ , “\*” for  $p \leq 0.05$ , “\*\*\*” for  $p \leq 0.01$ , “\*\*\*\*” for  $p \leq 0.001$  and “\*\*\*\*\*” for  $p \leq 0.0001$ .

|              | Lag time (h)     | Sign. level | Gen time (h)    | Sign. level | Yield ( $\Delta$ Scat. light) | Sign. level |
|--------------|------------------|-------------|-----------------|-------------|-------------------------------|-------------|
| No_CRISPRa/i | 3.34 $\pm$ 0.07  | -           | 2.93 $\pm$ 0.05 | -           | 50.80 $\pm$ 0.06              | -           |
| dCas9        | 4.56 $\pm$ 0.36  | *           | 3.81 $\pm$ 0.31 | ns          | 49.79 $\pm$ 4.23              | ns          |
| dCas9-VP64   | 4.88 $\pm$ 0.22  | **          | 4.03 $\pm$ 0.06 | ****        | 52.83 $\pm$ 0.91              | ns          |
| dCas9-Mxi1   | 9.13 $\pm$ 1.45  | *           | 4.64 $\pm$ 0.01 | ***         | 42.08 $\pm$ 1.34              | *           |
| dCas9-VPR    | 7.52 $\pm$ 0.77  | *           | 4.83 $\pm$ 0.13 | ***         | 47.99 $\pm$ 1.67              | ns          |
| dCas9-HC     | 5.49 $\pm$ 1.86  | ns          | 5.00 $\pm$ 0.04 | ****        | 42.07 $\pm$ 2.86              | *           |
| dCas9-VPR-HC | 16.80 $\pm$ 0.60 | ***         | 6.30 $\pm$ 0.29 | **          | 17.22 $\pm$ 0.28              | ****        |



Table S2. mRuby2 fluorescence of KE6-12-Ruby strains. The strains carry different CRISPRa/i plasmids with different sgRNAs or the sgRNA placeholder (No sgRNA). % increase refers to the fluorescence change compared to the No sgRNA control. Fluorescence expressed as geometric mean. Data represents three biological and three technical replicates, measured by flow cytometry (samples taken after 24h of culture).

|                   | <b>Strain</b> | <b>MFI</b> | <b>% increase</b> |                     | <b>Strain</b> | <b>MFI</b> | <b>% increase</b> |
|-------------------|---------------|------------|-------------------|---------------------|---------------|------------|-------------------|
| <b>dCas9</b>      | No sgRNA      | 22.7       | -                 | <b>dCas9-VPR</b>    | No sgRNA      | 18.1       | -                 |
|                   | sg1           | 21.4       | -5.4              |                     | sg1           | 17.5       | -3.0              |
|                   | sg2           | 14.6       | -35.5             |                     | sg2           | 16.6       | -8.3              |
|                   | sg3           | 17.2       | -24.0             |                     | sg3           | 28.3       | 56.6              |
|                   | sg4           | 17.3       | -23.7             |                     | sg4           | 29.8       | 64.7              |
|                   | sg5           | 16.6       | -26.8             |                     | sg5           | 20.8       | 14.9              |
|                   | sg6           | 22.7       | -0.1              |                     | sg6           | 19.5       | 8.2               |
| <b>dCas9-VP64</b> | No sgRNA      | 21.5       | -                 | <b>dCas9-HC</b>     | No sgRNA      | 18.8       | -                 |
|                   | sg1           | 22.1       | 2.7               |                     | sg1           | 19.5       | 3.9               |
|                   | sg2           | 16.2       | -24.8             |                     | sg2           | 13.7       | -27.0             |
|                   | sg3           | 23.8       | 10.6              |                     | sg3           | 16.2       | -13.8             |
|                   | sg4           | 24.1       | 12.3              |                     | sg4           | 16.7       | -11.1             |
|                   | sg5           | 19.1       | -11.1             |                     | sg5           | 15.4       | -18.2             |
|                   | sg6           | 21.5       | 0.0               |                     | sg6           | 19.1       | 1.5               |
| <b>dCas9-Mxi1</b> | No sgRNA      | 21.1       | -                 | <b>dCas9-VPR-HC</b> | No sgRNA      | 20.6       | -                 |
|                   | sg1           | 22.8       | 7.6               |                     | sg1           | 21.8       | 5.6               |
|                   | sg2           | 11.7       | -44.7             |                     | sg2           | 18.6       | -9.9              |
|                   | sg3           | 12.3       | -42.1             |                     | sg3           | 24.8       | 20.5              |
|                   | sg4           | 14.3       | -32.3             |                     | sg4           | 25.0       | 21.2              |
|                   | sg5           | 14.3       | -32.5             |                     | sg5           | 20.0       | -2.9              |
|                   | sg6           | 22.5       | 6.3               |                     | sg6           | 22.5       | 9.1               |

Table S3. Venus fluorescence of KE6-12-Ruby-Venus strains. The strains carry different CRISPRa/i plasmids with different sgRNAs or the sgRNA placeholder (No sgRNA). % increase refers to the fluorescence change compared to the No sgRNA control. Fluorescence expressed as geometric mean. Data represents three biological and three technical replicates, measured by flow cytometry.

|                   | <b>Strain</b> | <b>MFI</b> | <b>% increase</b> |                     | <b>Strain</b> | <b>MFI</b> | <b>% increase</b> |
|-------------------|---------------|------------|-------------------|---------------------|---------------|------------|-------------------|
| <b>dCas9</b>      | No sgRNA      | 89.8       | -                 | <b>dCas9-HC</b>     | No sgRNA      | 72.7       | -                 |
|                   | sg7           | 88.7       | -1.2              |                     | sg7           | 69.9       | -3.9              |
|                   | sg8           | 89.1       | -0.8              |                     | sg8           | 73.6       | 1.2               |
|                   | sg9           | 97.5       | 8.6               |                     | sg9           | 76.8       | 5.7               |
| <b>dCas9-Mxi1</b> | No sgRNA      | 86.9       | -                 | <b>dCas9-VPR-HC</b> | No sgRNA      | 56.8       | -                 |
|                   | sg7           | 77.4       | -10.9             |                     | sg7           | 73.2       | 28.9              |
|                   | sg8           | 84.6       | -2.6              |                     | sg8           | 76.3       | 34.2              |
|                   | sg9           | 64.5       | -25.8             |                     | sg9           | 88.7       | 56.2              |
| <b>dCas9-VPR</b>  | No sgRNA      | 79.9       | -                 |                     |               |            |                   |
|                   | sg7           | 77.9       | -2.6              |                     |               |            |                   |
|                   | sg8           | 81.8       | 2.3               |                     |               |            |                   |
|                   | sg9           | 101.8      | 27.3              |                     |               |            |                   |

Table S4. Primers used for amplification of PCR products for cloning. All plasmids were verified by sequencing.

| Plasmid ID | Description                                                      | Primer sequences (5'->3')                                                                                                                                                                   | Template                             |
|------------|------------------------------------------------------------------|---------------------------------------------------------------------------------------------------------------------------------------------------------------------------------------------|--------------------------------------|
| EC0_1      | Entry plasmid pYTK001 carrying SV40 NLS - dCas9 - SV40 NLS       | F1:gatccgtctcatcgggtctcatatgccaaaga<br>agaagagaaaggtagg<br>R1:tcgtctctttcccctgaatcaaagagga<br>F2:tcgtctctggaaaccgctgaagcaaccg<br>R2:atgccgtctcagggtctcaggatCCtaccttgcgcttttcttgggatcccctccg | pTDH3-dCas9-Mxi1 (Addgene #46921)    |
| EC0_2      | Entry plasmid pYTK001 carrying VP64 - SV40 NLS                   | F:gatccgtctcatcgggtctcaatccgacgcattg<br>gacgatt<br>R:atgccgtctcagggtctcagccactcgagtaa<br>actttgcgtttcttttcggaatcagcatgtc                                                                    | pAG414GPD-dCas9-VPR (Addgene #63801) |
| EC0_3      | Entry plasmid pYTK001 carrying Mxi1-SV40 NLS                     | F:gatccgtctcatcgggtctcaatccatggaacgt<br>gtgagaa<br>R:atgccgtctcagggtctcagccactcgagtaa<br>actttgcgtttcttttcggtctgggagagggcatg<br>ctagg                                                       | pTDH3-dCas9-Mxi1 (Addgene #46921)    |
| EC0_4      | Entry plasmid pYTK001 carrying VPR (VP64 - SV40 NLS - p65 - Rta) | F1:gatccgtctcatcgggtctcaatccgacgcatt<br>ggacgatt<br>R1: acgtctctttcttcatcgggatcct<br>F2:acgtctctagaaacgagccagggtgtca<br>R2:atgccgtctcagggtctcagccactcgagtta<br>aaacagagatgtgtcgaaga         | pAG414GPD-dCas9-VPR (Addgene #63801) |

Table S5. MoClo plasmid construction. Plasmids were constructed using PCR products, dsDNA fragments and MoClo compatible plasmids.

| <b>Plasmid ID</b> | <b>Description</b>                                                     | <b>Parts assembled</b>                                                              |
|-------------------|------------------------------------------------------------------------|-------------------------------------------------------------------------------------|
| <b>Level 1</b>    |                                                                        |                                                                                     |
| EC1_1             | Plasmid for expressing <i>dCas9</i>                                    | pYTK002 / pYTK013 / EC0_1 / pYTK056 / pYTK067 / pYTK077 / pYTK081 / pYTK083         |
| EC1_2             | Plasmid for expressing <i>dCas9</i> and <i>VP64</i>                    | pYTK002 / pYTK013 / EC0_1 / EC0_2 / pYTK066 / pYTK067 / pYTK077 / pYTK081 / pYTK083 |
| EC1_3             | Plasmid for expressing <i>dCas9</i> and <i>Mxi1</i>                    | pYTK002 / pYTK013 / EC0_1 / EC0_3 / pYTK066 / pYTK067 / pYTK077 / pYTK081 / pYTK083 |
| EC1_4             | Plasmid expressing <i>dCas9</i> and <i>VPR</i>                         | pYTK002 / pYTK013 / EC0_1 / EC0_4 / pYTK066 / pYTK067 / pYTK077 / pYTK081 / pYTK083 |
| EC1_7             | Plasmid expressing sgRNA cassette and the placeholder                  | pYTK003 / EC0_6 / pYTK072 / pYTK077 / pYTK081 / pYTK083                             |
| EC1_8             | Plasmid expressing <i>Cas9</i>                                         | pYTK002 / pYTK013 / pYTK036 / pYTK056 / pYTK067 / pYTK077 / pYTK081 / pYTK083       |
| EC1_9             | Plasmid backbone for level 2 assembly of low copy plasmids             | pYTK008 / pYTK047 / pYTK073 / pYTK077 / pYTK081 / pYTK084                           |
| EC1_10            | Plasmid expressing <i>mRuby2</i> under <i>TDH3p</i>                    | pYTK002 / pYTK009 / pYTK034 / pYTK056 / pYTK072 / pYTK077 / pYTK081 / pYTK083       |
| EC1_11            | Plasmid backbone for level 2 assembly of multi-copy plasmids           | pYTK008 / pYTK047 / pYTK073 / pYTK077 / pYTK082 / pYTK084                           |
| YN1_1             | Plasmid expressing <i>Cas9</i>                                         | pYTK002 / pYTK011 / pYTK036 / pYTK054 / pYTK072 / pYTK077 / pYTK081 / pYTK083       |
| YN1_2             | Plasmid backbone for YN level 2 plasmid                                | pYTK002 / pYTK073 / pYTK077 / pYTK081 / pYTK082                                     |
| <b>Level 2</b>    |                                                                        |                                                                                     |
| EC2_1             | Low copy plasmid with <i>dCas9</i> and sgRNA expression cassettes      | EC1_1 / EC1_7 / EC1_9                                                               |
| EC2_2             | Low copy plasmid with <i>dCas9-VP64</i> and sgRNA expression cassettes | EC1_2 / EC1_7 / EC1_9                                                               |
| EC2_3             | Low copy plasmid with <i>dCas9-Mxi1</i> and sgRNA expression cassettes | EC1_3 / EC1_7 / EC1_9                                                               |
| EC2_4             | Low copy plasmid with <i>dCas9-VPR</i> and sgRNA expression cassettes  | EC1_4 / EC1_7 / EC1_9                                                               |
| EC2_5             | Plasmid for genome editing by CRISPR/Cas9                              | EC1_7 / EC1_8 / EC1_9                                                               |
| EC2_7             | High copy plasmid with <i>dCas9</i> and sgRNA expression cassettes     | EC1_1 / EC1_7 / EC1_11                                                              |

|                  |                                                                                      |                        |
|------------------|--------------------------------------------------------------------------------------|------------------------|
| EC2_10           | High copy plasmid expressing dCas9, VPR and the sgRNA expression cassette            | EC1_4 / EC1_7 / EC1_11 |
| YN2_1            | Plasmid for genome editing by CRISPR/Cas9                                            | YN1_1 / YN1_2          |
| YN2_1_Cas9_Ruby  | CRISPR/Cas9 plasmid expressing sgRNA targeting PDR12 locus for mRuby2 insertion      | YN2_1 + sg_PDR12       |
| YN2_1_Cas9_Venus | CRISPR/Cas9 plasmid expressing sgRNA targeting <i>HRK1</i> locus for Venus insertion | YN2_1 + sg_HRK1        |

Table S6. Primers used for donor DNA amplification or creation.

| Description                                                                            | Primer sequences (5'->3')                                                                                                                                                                                        | Template |
|----------------------------------------------------------------------------------------|------------------------------------------------------------------------------------------------------------------------------------------------------------------------------------------------------------------|----------|
| Primer set for amplification of <i>mRuby2</i> with homology arms to <i>PDR12</i> locus | F:atgtacaaggtgaattctcctatgatggctctggaccaaagcagttcgagtt<br>tatcattatcaatactgccatttc<br>R:tggaatggaaatcaagctcgggacagtaaataacgtaacgttcag<br>ggtaatatatttaaccgccg                                                    | EC1_10   |
| Primer set for amplification of <i>mRuby2</i> with homology arms to <i>HRK1</i> locus  | F:taatacggtagaactatttctcgataaagatgtctaaaggtgaagaatta<br>ttcactgggtg<br>R:aaagaagtgaaaataattgagtagtctcgatcaggatcctttgtacaattc<br>atccatacca                                                                       | pYTK033  |
| SSK2_barcode (ds oligo used for SSK2 disruption)                                       | F:cctgaaacagtggtatttttagcagtttgcattattaatggccaggcggaattaggtaatg<br>ccatttctgggtcctccagctcctcggaagatcta<br>R:tagatctgccgaggagctggaggaccagaaatggcatttacctaattaccgctggcc<br>attaataatgcaaaactgctaaaatacccactgttcagg |          |

Table S7. Scores obtained by CRISP-ERA (Liu et al. Bioinformatics. 2015;31:3676–8) and YEAST-CRISPRi (Smith et al. Genome Biol. 2016;17:45) the sgRNAs selected.

| ID   | POS.<br>(rel. to<br>TSS) | SEQUENCE              | CRISP-ERA      |                 |                   | YEAST-CRISPRi      |                    |
|------|--------------------------|-----------------------|----------------|-----------------|-------------------|--------------------|--------------------|
|      |                          |                       | ST<br>RA<br>ND | E-<br>SCO<br>RE | OFF<br>TAR<br>GET | NUCL<br>EOSO<br>ME | CHRO<br>MATIN<br>E |
| sg1  | 0                        | ACACACATAAACAAACAAAA  | +              | 15              | 0                 | -                  | -                  |
| sg2  | -127                     | AATAAGTATATAAAGACGGT  | +              | 15              | 0                 | 0.03               | 0.35               |
| sg3  | -277                     | CTGGAGTAAATGATGACACA  | +              | 20              | 0                 | 0.04               | 0.82               |
| sg4  | -351                     | TAGCGCAACTACAGAGAACA  | +              | 20              | 0                 | 0.11               | 0.87               |
| sg5  | -469                     | CTGGCATCCACTAAATATAA  | +              | 20              | 0                 | 0.13               | 0.61               |
| sg6  | -541                     | TACATGCCCAAATAGGGGG   | +              | 20              | 0                 | 0                  | 0.59               |
| sg7  | -41                      | AAGTGGAAAACGTGTTAAATC | -              | 20              | 0                 | 0.04               | 0.37               |
| sg8  | -213                     | TAAGCGGTTGGGAACTGTCT  | -              | 15              | 0                 | 0.3                | 0.24               |
| sg9  | -355                     | AAGGGGCGGCGACGACGTAG  | -              | 15              | 0                 | 0                  | 0.59               |
| sg10 | -20                      | CCAAATCTGCAGATTAGAAG  | +              | 20              | -19               | 0.51               | 0.1                |
| sg11 | -183                     | CGTTTCATACCCTGAAACAG  | +              | 20              | -16               | 0.27               | 0.33               |
| sg12 | -320                     | TCGTCCAATTCCATCTCTAC  | +              | 20              | -16               | 0.32               | 0.41               |
| sg13 | -32                      | TCATTCTTGAACCTTGTCAT  | -              | 20              | -48               | 0.18               | 0.09               |
| sg14 | -177                     | AGCAAGGGGGTTAACCACCA  | -              | 20              | -48               | 0.74               | 0.16               |
| sg15 | -321                     | AGAAACTGAAATCCCTTCCG  | -              | 15              | -48               | 0                  | 0.36               |
| sg16 | +24                      | GTTACACGAGAGGAAGGAAGA | -              | 20              | 0                 | 0.12               | 0.33               |
| sg17 | -143                     | ATGAGCGGTTTTAATTGAAT  | -              | 15              | 0                 | 0.31               | 0.54               |
| sg18 | -260                     | TTTGCTGACGTGCCAGTACC  | -              | 20              | 0                 | 0.37               | 0.37               |

Table S8. Oligonucleotides used as placeholder or sgRNA. In capital letters, the 20-nt specific sgRNA protospacer sequence. TSS = Transcription start site

| <b>dsDNA ID</b> | <b>Description</b>                                                                      | <b>Oligonucleotide sequences (5'-&gt;3')</b>                                                                                                                                                                        |
|-----------------|-----------------------------------------------------------------------------------------|---------------------------------------------------------------------------------------------------------------------------------------------------------------------------------------------------------------------|
| Placeholder     | sequence non-homologous to the yeast genome containing two BbsI sites for Moclo cloning | F: gactcgctatcgtcttctcacgaagacttactca<br>R: aaactgagtaagtcttcgtgagaagacgatagcg                                                                                                                                      |
| sg1             | sgRNA targeting <i>TDH3p</i> at +1 relative to the TSS                                  | F:ggcgccggctgggcaacaccttcgggtggcgaatgggactACACACATAA<br>ACAAACAAAAGtttagagctagaaatagcaagttaaataaggctagtc<br>R:gactagcctattttaactgctatttctagctctaaaacTTTTGTTTGTATG<br>TGTGTagtccattcgccacccgaagggtgtgccagccggcgcc    |
| sg2             | sgRNA targeting at -127 relative to the TSS                                             | F:ggcgccggctgggcaacaccttcgggtggcgaatgggactAATAAGTATAT<br>AAAGACGGTgttttagagctagaaatagcaagttaaataaggctagtc<br>R:gactagcctattttaactgctatttctagctctaaaacACCGTCTTTATATA<br>CTTATTagtccattcgccacccgaagggtgtgccagccggcgcc |
| sg3             | sgRNA targeting at -277 relative to the TSS                                             | F:ggcgccggctgggcaacaccttcgggtggcgaatgggactCTGGAGTAAA<br>TGATGACACAgtttagagctagaaatagcaagttaaataaggctagtc<br>R:gactagcctattttaactgctatttctagctctaaaacTGTGTCATCATTTA<br>CTCCAGagtccattcgccacccgaagggtgtgccagccggcgcc  |
| sg4             | sgRNA targeting <i>TDH3p</i> at -351 relative to the TSS                                | F:ggcgccggctgggcaacaccttcgggtggcgaatgggactTAGCGCAACT<br>ACAGAGAACAgtttagagctagaaatagcaagttaaataaggctagtc<br>R:gactagcctattttaactgctatttctagctctaaaacGTTTCTCTGTAGTT<br>GCGCTAagtccattcgccacccgaagggtgtgccagccggcgcc  |
| sg5             | sgRNA targeting <i>TDH3p</i> at -469 relative to the TSS                                | F:ggcgccggctgggcaacaccttcgggtggcgaatgggactCTGGCATCCA<br>CTAAATATAAgtttagagctagaaatagcaagttaaataaggctagtc<br>R:gactagcctattttaactgctatttctagctctaaaacTTATATTTAGTGGAT<br>GCCAGagtccattcgccacccgaagggtgtgccagccggcgcc  |
| sg6             | sgRNA targeting <i>TDH3p</i> at -541 relative to the TSS                                | F:ggcgccggctgggcaacaccttcgggtggcgaatgggactTACATGCCCA<br>AAATAGGGGGgttttagagctagaaatagcaagttaaataaggctagtc<br>R:gactagcctattttaactgctatttctagctctaaaacCCCCCTATTTTGGG<br>CATGTAagtccattcgccacccgaagggtgtgccagccggcgcc |
| sg7             | sgRNA targeting <i>HRK1p</i> at -41 relative to the TSS                                 | F:ggcgccggctgggcaacaccttcgggtggcgaatgggactAAGTGGAAAA<br>CTGTTAAATCgttttagagctagaaatagcaagttaaataaggctagtc<br>R:gactagcctattttaactgctatttctagctctaaaacGATTTAACAGTTTT<br>CCACTTagtccattcgccacccgaagggtgtgccagccggcgcc |
| sg8             | sgRNA targeting at -213 relative to the TSS                                             | F:ggcgccggctgggcaacaccttcgggtggcgaatgggactTAAGCGGTTG<br>GAACTGTCTgttttagagctagaaatagcaagttaaataaggctagtc<br>R:gactagcctattttaactgctatttctagctctaaaacAGACAGTTCCCAAC<br>CGCTTAagtccattcgccacccgaagggtgtgccagccggcgcc  |
| sg9             | sgRNA targeting at -355 relative to the TSS                                             | F:ggcgccggctgggcaacaccttcgggtggcgaatgggactAAGGGGCGG<br>CGACGACGTAGgttttagagctagaaatagcaagttaaataaggctagtc<br>R:gactagcctattttaactgctatttctagctctaaaacCTACGTCGTCGCCGC<br>CCCTTagtccattcgccacccgaagggtgtgccagccggcgcc |

|              |                                                                                          |                                                                                                                                                                                                                        |
|--------------|------------------------------------------------------------------------------------------|------------------------------------------------------------------------------------------------------------------------------------------------------------------------------------------------------------------------|
| sg10         | sgRNA targeting<br><i>SSK2p</i> at -20<br>relative to the<br>TSS                         | F:ggcgccggctgggcaacaccttcgggtggcgaatgggactCCAAATCTGC<br>AGATTAGAAGgttttagagctagaaatagcaagttaaataaggctagtc<br>R:gactagccttattttaactgctatttctagctctaaaacCTTCTAATCTGCAG<br>ATTTGGagtcccattcgccacccgaaggtgttgcccagccggcgcc |
| sg11         | sgRNA targeting<br><i>SSK2p</i> at -183<br>relative to the<br>TSS                        | F:ggcgccggctgggcaacaccttcgggtggcgaatgggactCGTTTCATAC<br>CCTGAAACAGgttttagagctagaaatagcaagttaaataaggctagtc<br>R:gactagccttattttaactgctatttctagctctaaaacCTGTTTCAGGGTAT<br>GAAACGagtcccattcgccacccgaaggtgttgcccagccggcgcc |
| sg12         | sgRNA targeting<br><i>SSK2p</i> at -320<br>relative to the<br>TSS                        | F:ggcgccggctgggcaacaccttcgggtggcgaatgggactTCGTCCAATT<br>CCATCTCTACgttttagagctagaaatagcaagttaaataaggctagtc<br>R:gactagccttattttaactgctatttctagctctaaaacGTAGAGATGGAATT<br>GGACGAagtcccattcgccacccgaaggtgttgcccagccggcgcc |
| sg13         | sgRNA targeting<br><i>BDH2p</i> at -32<br>relative to the<br>TSS                         | F:ggcgccggctgggcaacaccttcgggtggcgaatgggactTCATTCTTGAA<br>CCTTGTCATgttttagagctagaaatagcaagttaaataaggctagtc<br>R:gactagccttattttaactgctatttctagctctaaaacATGACAAGGTTCAA<br>GAATGAagtcccattcgccacccgaaggtgttgcccagccggcgcc |
| sg14         | sgRNA targeting<br><i>BDH2p</i> at -177<br>relative to the<br>TSS                        | F:ggcgccggctgggcaacaccttcgggtggcgaatgggactAGCAAGGGG<br>GTAAACCACCAgttttagagctagaaatagcaagttaaataaggctagtc<br>R:gactagccttattttaactgctatttctagctctaaaacTGGTGGTTAACCC<br>CTTGCTagtcccattcgccacccgaaggtgttgcccagccggcgcc  |
| sg15         | sgRNA targeting<br><i>BDH2p</i> at -321<br>relative to the<br>TSS                        | F:ggcgccggctgggcaacaccttcgggtggcgaatgggactAGAAACTGAA<br>ATCCCTCCGgttttagagctagaaatagcaagttaaataaggctagtc<br>R:gactagccttattttaactgctatttctagctctaaaacCGGAAGGGATTTC<br>GTTTCTagtcccattcgccacccgaaggtgttgcccagccggcgcc   |
| sg16         | sgRNA targeting<br><i>ISC1p</i> at +24<br>relative to the<br>TSS                         | F:ggcgccggctgggcaacaccttcgggtggcgaatgggactGTTACGAGA<br>GGAAGGAAGAggttttagagctagaaatagcaagttaaataaggctagtc<br>R:gactagccttattttaactgctatttctagctctaaaacTCTTCCTTCCTCTC<br>GTGAACagtcccattcgccacccgaaggtgttgcccagccggcgcc |
| sg17         | sgRNA targeting<br><i>ISC1p</i> at -143<br>relative to the<br>TSS                        | F:ggcgccggctgggcaacaccttcgggtggcgaatgggactATGAGCGGTT<br>TTAATTGAATgttttagagctagaaatagcaagttaaataaggctagtc<br>R:gactagccttattttaactgctatttctagctctaaaacATTCAATTAACC<br>GTCATagtcccattcgccacccgaaggtgttgcccagccggcgcc    |
| sg18         | sgRNA targeting<br><i>ISC1p</i> at -233<br>relative to the<br>TSS                        | F:ggcgccggctgggcaacaccttcgggtggcgaatgggactTTTGCTGACG<br>TGCCAGTACCgttttagagctagaaatagcaagttaaataaggctagtc<br>R:gactagccttattttaactgctatttctagctctaaaacGGTACTGGCACGT<br>CAGCAAagtcccattcgccacccgaaggtgttgcccagccggcgcc  |
| sg_<br>PDR12 | sgRNA targeting<br><i>PDR12</i> at +668<br>relative to the<br>TSS                        | F: gactgaaatgatgctaaagtataa<br>R:aaactatacttagacatcatttc                                                                                                                                                               |
| sg_<br>HRK1  | sgRNA targeting<br><i>HRK1</i> at +32<br>relative to the<br>TSS                          | F: gactttgtcgagaaacccattcca<br>R: aaactggaatgggtttctcgacaa                                                                                                                                                             |
| sg_<br>SSK2  | sgRNA targeting<br><i>SSK2</i> at -221<br>relative to the<br>transcription<br>start site | F: tctaaggcaataacacactg<br>R: cagtgtgtattgcctaga                                                                                                                                                                       |



Table S9. Primers used for verification of sgRNA integration and strain construction.

| Description                                                                        | Primer sequences (5'->3')                                                                |
|------------------------------------------------------------------------------------|------------------------------------------------------------------------------------------|
| Primer set for verification of <i>in vivo</i> assembly of sg1 in level 2 plasmids  | F: ggatgtatgggctaaatgtacggg<br>R: acacacataaacaacaaaagtttagagct                          |
| Primer set for verification of <i>in vivo</i> assembly of sg2 in level 2 plasmids  | F: ggatgtatgggctaaatgtacggg<br>R: aataagtatataaagacgggtgtagagctagaat                     |
| Primer set for verification of <i>in vivo</i> assembly of sg3 in level 2 plasmids  | F: ggatgtatgggctaaatgtacggg<br>R: actctggagtaaataatgatgacacagtt                          |
| Primer set for verification of <i>in vivo</i> assembly of sg4 in level 2 plasmids  | F: ggatgtatgggctaaatgtacggg<br>R: tagcgcaactacagagaacagtttagag                           |
| Primer set for verification of <i>in vivo</i> assembly of sg5 in level 2 plasmids  | F: ggatgtatgggctaaatgtacggg<br>R: ctggcatccactaaatataagtttagagc                          |
| Primer set for verification of <i>in vivo</i> assembly of sg6 in level 2 plasmids  | F: ggatgtatgggctaaatgtacggg<br>R: tacatgcccaaataggggggtt                                 |
| Primer set for verification of <i>in vivo</i> assembly of sg7 in level 2 plasmids  | F: ggatgtatgggctaaatgtacggg<br>R: aagtggaaaactgttaaatcgtttagagc                          |
| Primer set for verification of <i>in vivo</i> assembly of sg8 in level 2 plasmids  | F: ggatgtatgggctaaatgtacggg<br>R: taagcgggtgggaactgtctg                                  |
| Primer set for verification of <i>in vivo</i> assembly of sg9 in level 2 plasmids  | F: ggatgtatgggctaaatgtacggg<br>R: aagggcgccgacga                                         |
| Primer set for verification of <i>mRuby2</i> integration at the <i>PDR12</i> locus | F: gatggtctggaccaaagcga<br>R: aataagcacctgccgtggtg                                       |
| Primer set for verification of <i>HRK1</i> locus replacement by Venus              | F: ccgtcaataacgtagcctttcttt<br>R1: aatggtcagctaattgaacaccacc<br>R2: cctctgtgctgttgactcga |
| Primer set for verification of <i>SSK2</i> locus disruption                        | F: tgttcaaattacctacaactcgct<br>R: aaactcttctccgtgctcc                                    |
| Primer set for verification of <i>dCas9</i> presence in the CRISPRa/i plasmid      | F: ggagattagcgggggtcgaag<br>R: aggggagagccagctcatta                                      |
| Primer set for cPCR verification ( <i>ADE2</i> amplification)                      | F: taaaaccgcacatgctggca<br>R: taggagggggacaattggg                                        |
